# Supplementary material for: EDC IMPACT: Molecular effects of developmental FM 550 exposure in Wistar rat placenta and fetal forebrain
Source: PubMed Central journal article supplement — Endocr Connect. 2018 Jan 19;7(2):305–24. doi: 10.1530/EC-17-0373 (PMC5817967; doi:10.1530/ec-17-0373), 2018-01-19
Supplement: ec-7-305-s002.pdf [file ec-7-305-s002.pdf]

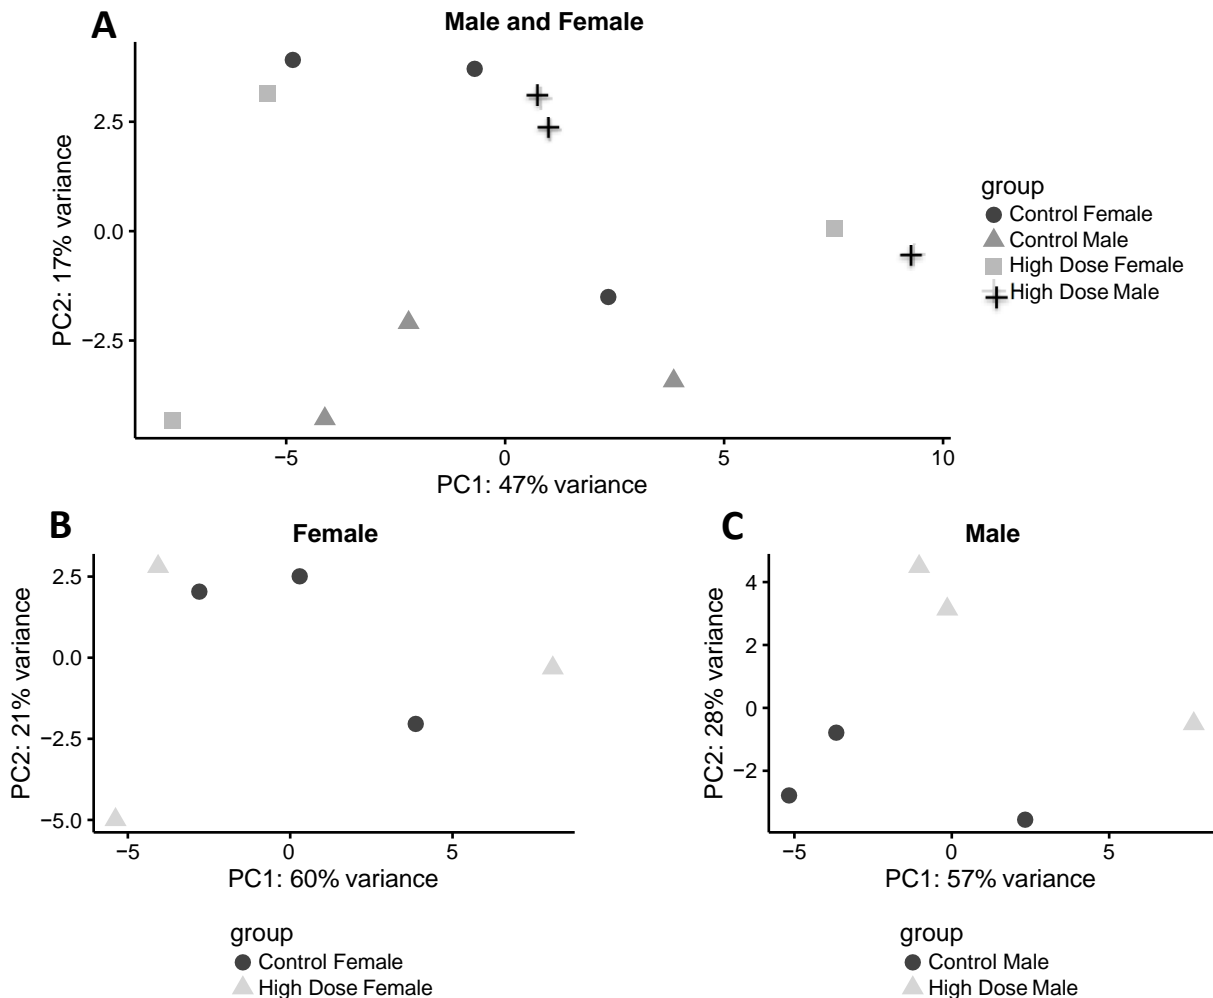

**Supplemental Figure 2.** Unsupervised principal component analysis (PCA) of fetal forebrain RNA-seq data did not cluster by exposure when sexes were analyzed together (A). However, when separated out by sex males clustered according to exposure group (C) while females did not (B).
