# Supplementary material for: EDC IMPACT: Molecular effects of developmental FM 550 exposure in Wistar rat placenta and fetal forebrain
Source: PubMed Central journal article supplement — Endocr Connect. 2018 Jan 19;7(2):305–24. doi: 10.1530/EC-17-0373 (PMC5817967; doi:10.1530/ec-17-0373), 2018-01-19
Supplement: ec-7-305-s003.pdf [file ec-7-305-s003.pdf]

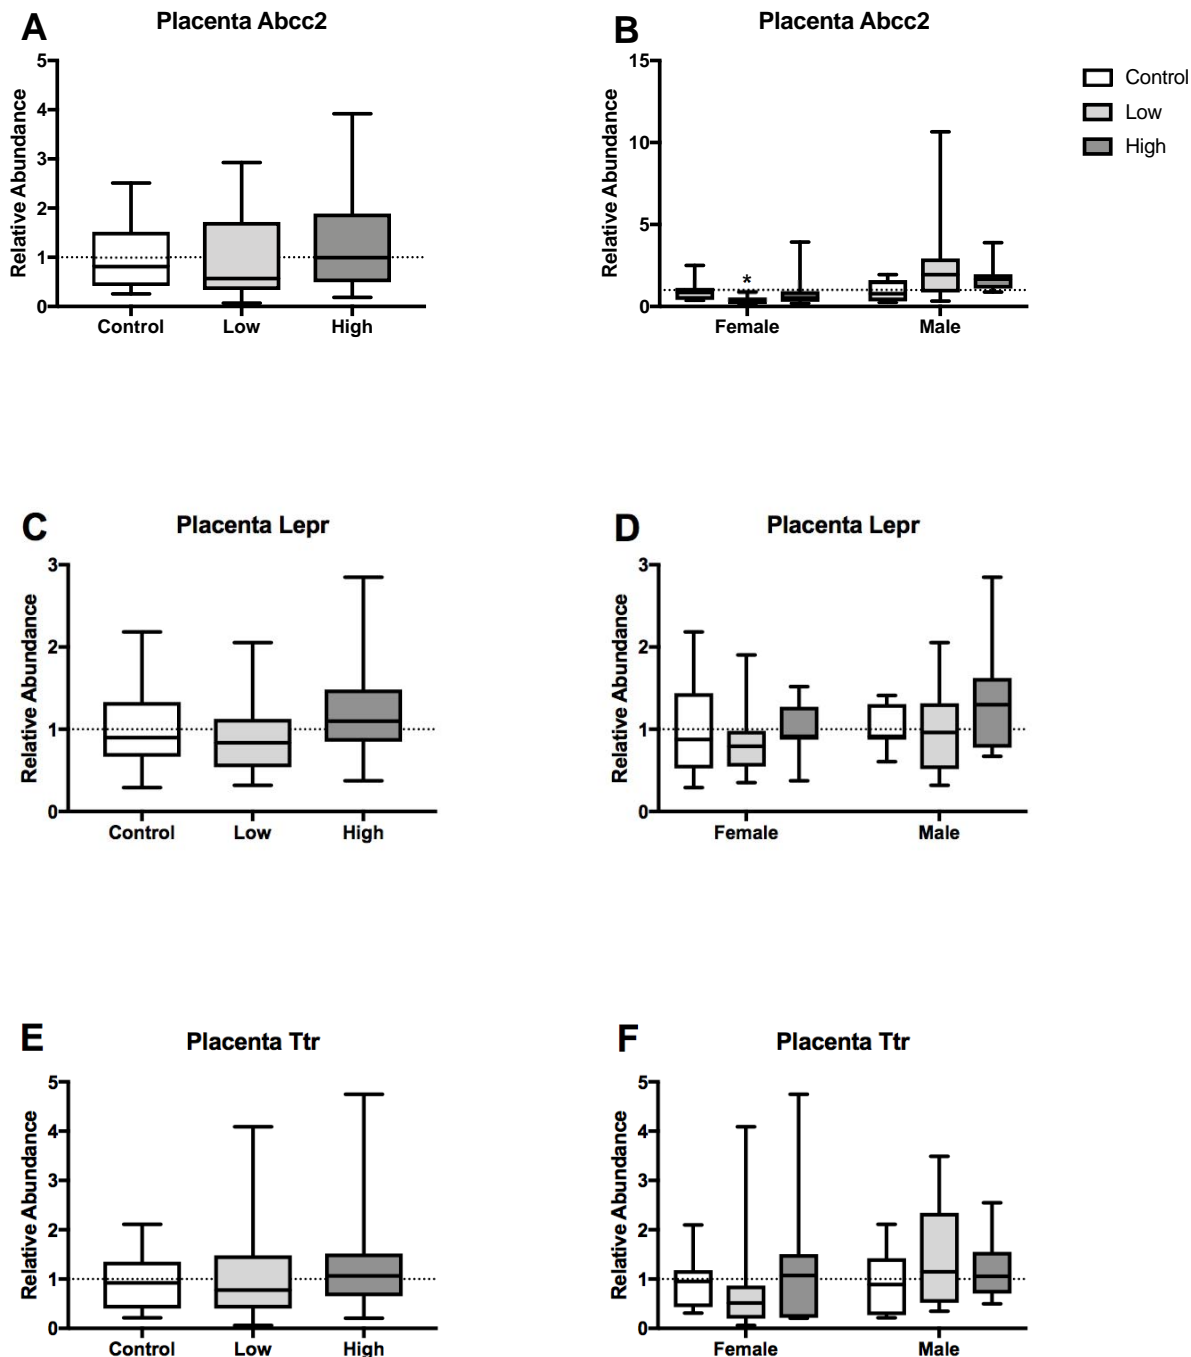

**Supplemental Figure 3.** Effects of prenatal exposure on the relative abundance of genes related to FXR/RXR signaling (A and B) and endocrine signaling (C – F). A significant effect of exposure was only found for *Abcc2* in females exposed to the lowest dose (B). Graphs depict mean  $\pm$  SEM (\*  $p \leq 0.05$ ).
