# Supplementary material for: EDC IMPACT: Molecular effects of developmental FM 550 exposure in Wistar rat placenta and fetal forebrain
Source: PubMed Central journal article supplement — Endocr Connect. 2018 Jan 19;7(2):305–24. doi: 10.1530/EC-17-0373 (PMC5817967; doi:10.1530/ec-17-0373), 2018-01-19
Supplement: ec-7-305-s004.pdf [file ec-7-305-s004.pdf]

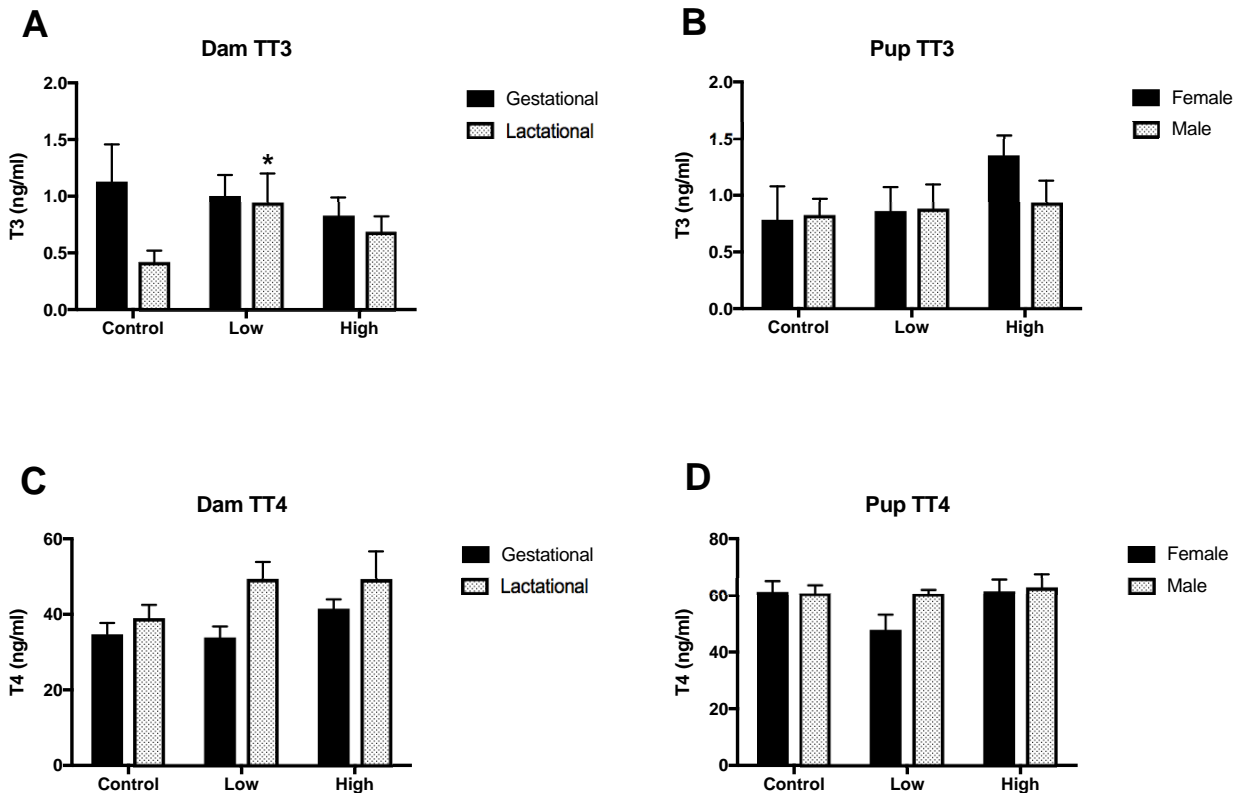

**Supplemental Figure 4.** Average levels of total thyroxine (TT4) and total triiodothyronine (TT3) from the serum of dams during gestation (GD 18) or lactation (PND 21) and in serum from male and female pups (PND 21). A significant effect of exposure was only found for TT3 in dams exposed to the lowest dose during lactation (A). Graphs depict mean  $\pm$  SEM (\*  $p \leq 0.05$ ).
