# Supplementary material for: EDC IMPACT: Molecular effects of developmental FM 550 exposure in Wistar rat placenta and fetal forebrain
Source: PubMed Central journal article supplement — Endocr Connect. 2018 Jan 19;7(2):305–24. doi: 10.1530/EC-17-0373 (PMC5817967; doi:10.1530/ec-17-0373), 2018-01-19
Supplement: ec-7-305-t001.pdf [file ec-7-305-t001.pdf]

**Suppl. Table 1.** Sample size of each group evaluated for thyroid hormone concentrations.

| <b>FM 550 Exposure Period</b> | <b>FM 550 Dose</b> | <b>Rat Developmental Stage</b> | <b>Sample size, <i>n</i></b> |
|-------------------------------|--------------------|--------------------------------|------------------------------|
| Gestational (GD 9-18)         | Control            | Dam                            | 6                            |
|                               | Low                | Dam                            | 6                            |
|                               | High               | Dam                            | 6                            |
| Lactational (PND 3-12)        | Control            | Dam                            | 6                            |
|                               | Low                | Dam                            | 6                            |
|                               | High               | Dam                            | 7*                           |
| Lactational (PND 3-12)        | Control            | Pup                            | 6                            |
|                               | Low                | Pup                            | 6                            |
|                               | High               | Pup                            | 7                            |

\**n* = 5 for TT3 analyses
