# Supplementary material for: EDC IMPACT: Molecular effects of developmental FM 550 exposure in Wistar rat placenta and fetal forebrain
Source: PubMed Central journal article supplement — Endocr Connect. 2018 Jan 19;7(2):305–24. doi: 10.1530/EC-17-0373 (PMC5817967; doi:10.1530/ec-17-0373), 2018-01-19
Supplement: ec-7-305-t002.pdf [file ec-7-305-t002.pdf]

**Suppl .Table 2.** Average thyroid hormone concentrations (ng/mL) in sampled rat serum.

|             |                                 | <b>Control</b> | <b>Low</b> | <b>High</b> |
|-------------|---------------------------------|----------------|------------|-------------|
| <b>TT4</b>  | <b>Gestational Dam (GD 18)</b>  | 34.7           | 33.9       | 41.5        |
|             | <b>Lactational Dam (PND 12)</b> | 38.3           | 49.4       | 49.3        |
|             | <b>Male Pup (PND 12)</b>        | 61.4           | 60.7       | 62.9        |
|             | <b>Female Pup (PND 12)</b>      | 62.7           | 47.8       | 61.6        |
| <b>TrT3</b> | <b>Gestational Dam (GD 18)</b>  | <MDL           | <MDL       | <MDL        |
|             | <b>Lactational Dam (PND 12)</b> | <MDL           | <MDL       | <MDL        |
|             | <b>Male Pup (PND 12)</b>        | <MDL           | <MDL       | <MDL        |
|             | <b>Female Pup (PND 12)</b>      | <MDL           | <MDL       | <MDL        |
| <b>TT3</b>  | <b>Gestational Dam (GD 18)</b>  | 1.13           | 1.00       | 0.80        |
|             | <b>Lactational Dam (PND 12)</b> | 0.42           | 0.94       | 0.69        |
|             | <b>Male Pup (PND 12)</b>        | 0.83           | 0.88       | 0.94        |
|             | <b>Female Pup (PND 12)</b>      | 0.78           | 0.86       | 1.35        |
